# Supplementary material for: Insights into the association between coagulopathy and inflammation: abnormal clot mechanics are a warning of immunologic dysregulation following major injury
Source: PubMed Central journal article supplement — Ann Transl Med. 2020 Dec;8(23):1576. doi: 10.21037/atm-20-3651 (PMC7791215; doi:10.21037/atm-20-3651), 2020-12
Supplement: atm-08-23-1576-dss.pdf [file atm-08-23-1576-dss.pdf]

## Data Sharing Statement

|                     |                                                                                                                                                    |                                                                                                                           |
|---------------------|----------------------------------------------------------------------------------------------------------------------------------------------------|---------------------------------------------------------------------------------------------------------------------------|
| <b>Article Info</b> | <a href="http://dx.doi.org/10.21037/atm-20-3651">http://dx.doi.org/10.21037/atm-20-3651</a>                                                        |                                                                                                                           |
| <b>Item</b>         | <b>Question</b>                                                                                                                                    | <b>Authors' Response<br/>(place "-" if not applicable)</b>                                                                |
| 1                   | Would you like to share data collected for your study to others?                                                                                   | Yes, if requested                                                                                                         |
| 2                   | If not, would you like to share the reason for your decision?                                                                                      |                                                                                                                           |
| 3                   | What data in particular will be shared?                                                                                                            | We would be happy to share the raw, deidentified data regarding admission labs, vital signs and immunologic assay values. |
| 4                   | Any other documents will be share? Such as study protocol, statistical analysis plan, informed consent form, clinical study report, analytic code. | None                                                                                                                      |
| 5                   | When will data availability begin?                                                                                                                 | At publication                                                                                                            |
| 6                   | When will data availability end?                                                                                                                   | One year after publication                                                                                                |
| 7                   | To whom will you share the data?                                                                                                                   | Trauma, acute care and orthopedic surgeons who are studying coagulopathy and inflammation after injury.                   |
| 8                   | For what type of analysis or purpose?                                                                                                              | For analysis of the immunologic or coagulation response to injury.                                                        |
| 9                   | How or where can the data/documents be obtained?                                                                                                   | Contact the corresponding author via email                                                                                |
| 10                  | Any other restrictions?                                                                                                                            | The requests for sharing data will be reviewed by all authors and approved prior to distribution.                         |
