# Supplementary material for: Insights into the association between coagulopathy and inflammation: abnormal clot mechanics are a warning of immunologic dysregulation following major injury
Source: PubMed Central journal article supplement — Ann Transl Med. 2020 Dec;8(23):1576. doi: 10.21037/atm-20-3651 (PMC7791215; doi:10.21037/atm-20-3651), 2020-12
Supplement: atm-08-23-1576-rc.pdf [file atm-08-23-1576-rc.pdf]

## STROBE Statement—checklist of items that should be included in reports of observational studies

| Section/item          | Item No | Recommendation                                                                                                                                                                                                                                                                                                                                | Reported on Page Number/Line Number                                           | Reported on Section/Paragraph |
|-----------------------|---------|-----------------------------------------------------------------------------------------------------------------------------------------------------------------------------------------------------------------------------------------------------------------------------------------------------------------------------------------------|-------------------------------------------------------------------------------|-------------------------------|
| Title and abstract    | 1       | (a) Indicate the study’s design with a commonly used term in the title or the abstract                                                                                                                                                                                                                                                        | Page 2, line 54                                                               | Abstract/ para 2              |
|                       |         | (b) Provide in the abstract an informative and balanced summary of what was done and what was found                                                                                                                                                                                                                                           | Page 2, lines 54 – 68                                                         | Abstract/ para 2-3            |
| Introduction          |         |                                                                                                                                                                                                                                                                                                                                               |                                                                               |                               |
| Background/ rationale | 2       | Explain the scientific background and rationale for the investigation being reported                                                                                                                                                                                                                                                          | Page 3-4, lines 89-120                                                        | Background/ para 1-3          |
| Objectives            | 3       | State specific objectives, including any prespecified hypotheses                                                                                                                                                                                                                                                                              | Page 4, lines 122-127                                                         | Background/ para 4            |
| Methods               |         |                                                                                                                                                                                                                                                                                                                                               |                                                                               |                               |
| Study design          | 4       | Present key elements of study design early in the paper                                                                                                                                                                                                                                                                                       | Page 5-7, lines 132-134, 141-147, 150-153, 163-166, 176-181, 184-190, 192-193 | Methods/ para 1-3, 5-8        |
| Setting               | 5       | Describe the setting, locations, and relevant dates, including periods of recruitment, exposure, follow-up, and data collection                                                                                                                                                                                                               | Page 5, lines 132-139                                                         | Methods/ para 1               |
| Participants          | 6       | (a) <b>Cohort study</b> —Give the eligibility criteria, and the sources and methods of selection of participants. Describe methods of follow-up<br><b>Case-control study</b> —Give the eligibility criteria, and the sources and methods of case ascertainment and control selection. Give the rationale for the choice of cases and controls | Page 5, lines 132-138 & 147                                                   | Methods/ para 1 & 2           |
|                       |         | (b) <b>Cohort study</b> —For matched studies, give matching criteria and number of exposed and unexposed                                                                                                                                                                                                                                      | Page 7, lines 183-190                                                         | Methods/ para 7               |
| Variables             | 7       | Clearly define all outcomes, exposures, predictors, potential confounders, and effect modifiers. Give diagnostic criteria, if applicable                                                                                                                                                                                                      | Page 5 & 7 & 8, lines 141-147, 184-185 & 189-190, 214-215                     | Methods/ para 2, 7 & 9        |

|                            |        |                                                                                                                                                                                      |                                                                                                                                                  |                             |
|----------------------------|--------|--------------------------------------------------------------------------------------------------------------------------------------------------------------------------------------|--------------------------------------------------------------------------------------------------------------------------------------------------|-----------------------------|
| Data sources/<br>measureme | 8<br>* | For each variable of interest, give sources of data and details of methods of assessment (measurement). Describe comparability of assessment methods if there is more than one group | Pages 5-8, lines 141-143, 150-153, 163-166, 168-181, 192-207                                                                                     | Methods/ para 2, 3, 5, 6& 8 |
| Bias                       | 9      | Describe any efforts to address potential sources of bias                                                                                                                            | Not applicable – 100 serial patients were followed with the stated exclusions (page 5, lines 134-138), no specific adjustments for bias occurred |                             |
| Study size                 | 10     | Explain how the study size was arrived at                                                                                                                                            | Page 5, lines 132-133                                                                                                                            | Methods/ para 1             |
| Quantitative variables     | 11     | Explain how quantitative variables were handled in the analyses. If applicable, describe which groupings were chosen and why                                                         | Page 8, lines 210-215                                                                                                                            | Methods/ para 8             |

|                     |        |                                                                                                                                                                                                                                                                                                           |                                                                       |                       |
|---------------------|--------|-----------------------------------------------------------------------------------------------------------------------------------------------------------------------------------------------------------------------------------------------------------------------------------------------------------|-----------------------------------------------------------------------|-----------------------|
| Statistical methods | 1<br>2 | (a) Describe all statistical methods, including those used to control for confounding                                                                                                                                                                                                                     | Page 5, 7 & 8, lines 150-151, 178-181, 184-190, 192-207, 210-215      | Methods/ para 3 & 6-9 |
|                     |        | (b) Describe any methods used to examine subgroups and interactions                                                                                                                                                                                                                                       | Page 7 & 8, lines 184-190, 192-207                                    | Methods/ para 7 & 8   |
|                     |        | (c) Explain how missing data were addressed                                                                                                                                                                                                                                                               | N/A; as a prospective observation study, we did not have missing data |                       |
|                     |        | (d) <i>Cohort study</i> —If applicable, explain how loss to follow-up was addressed<br><i>Case-control study</i> —If applicable, explain how matching of cases and controls was addressed<br><i>Cross-sectional study</i> —If applicable, describe analytical methods taking account of sampling strategy | N/A, there was no loss to follow-up                                   |                       |
|                     |        | (e) Describe any sensitivity analyses                                                                                                                                                                                                                                                                     | N/A, we did not perform sensitivity analysis                          |                       |
| Results             |        |                                                                                                                                                                                                                                                                                                           |                                                                       |                       |
| Participants        | 13*    | (a) Report numbers of individuals at each stage of study—eg numbers potentially eligible, examined for eligibility, confirmed eligible, included in the study, completing follow-up, and analysed                                                                                                         | Page 8, lines 221-223                                                 | Results/ para 1       |
|                     |        | (b) Give reasons for non-participation at each stage                                                                                                                                                                                                                                                      | Page 8, lines 221-223                                                 | Results/ para 1       |

|                   |     |                                                                                                                                                                                                              |                                                                                                                                              |                             |
|-------------------|-----|--------------------------------------------------------------------------------------------------------------------------------------------------------------------------------------------------------------|----------------------------------------------------------------------------------------------------------------------------------------------|-----------------------------|
|                   |     | (c) Consider use of a flow diagram                                                                                                                                                                           | N/A – with 100 consecutive patients and the noted exclusions without losses to follow-up, the value of a flow diagram was felt to be limited |                             |
| Descriptive data  | 14* | (a) Give characteristics of study participants (eg demographic, clinical, social) and information on exposures and potential confounders                                                                     | Page 9, lines 225-230                                                                                                                        | Results/ para 2             |
|                   |     | (b) Indicate number of participants with missing data for each variable of interest                                                                                                                          | N/A – no missing data for variables of interest                                                                                              |                             |
|                   |     | (c) <i>Cohort study</i> —Summarise follow-up time (eg, average and total amount)                                                                                                                             | N/A – no follow-up                                                                                                                           |                             |
| Outcome data      | 15* | <i>Cohort study</i> —Report numbers of outcome events or summary measures over time                                                                                                                          | Page 9 & 10, lines 239 (Table1), 244-249                                                                                                     | Results/ para 3, 4          |
|                   |     | <i>Case-control study</i> —Report numbers in each exposure category, or summary measures of                                                                                                                  |                                                                                                                                              |                             |
|                   |     | <i>Cross-sectional study</i> —Report numbers of outcome events or summary measures                                                                                                                           |                                                                                                                                              |                             |
| Main results      | 16  | (a) Give unadjusted estimates and, if applicable, confounder-adjusted estimates and their precision (eg, 95% confidence interval). Make clear which confounders were adjusted for and why they were included | Page 9-10, lines 232-237, 245-249, 252-258, 260-265                                                                                          | Results/ para 2, 3, 5, 6, 7 |
|                   |     | (b) Report category boundaries when continuous variables were categorized                                                                                                                                    | Page 5, lines 152-153                                                                                                                        | Methods/ para 3             |
|                   |     | (c) If relevant, consider translating estimates of relative risk into absolute risk for a meaningful                                                                                                         |                                                                                                                                              |                             |
| Other analyses    | 17  | Report other analyses done—eg analyses of subgroups and interactions, and sensitivity analyses                                                                                                               | Page 10 & 11, lines 268-278, 281-290                                                                                                         | Results/ para 8& 9          |
| <b>Discussion</b> |     |                                                                                                                                                                                                              |                                                                                                                                              |                             |

|             |        |                                                                                                                                                               |                                                                                             |                              |
|-------------|--------|---------------------------------------------------------------------------------------------------------------------------------------------------------------|---------------------------------------------------------------------------------------------|------------------------------|
| Key results | 1<br>8 | Summarise key results with reference to study objectives                                                                                                      | Page 13-16, lines<br>321-328, 338-342,<br>344-359, 361-368,<br>370-375, 377-383,<br>385-392 | Conclusions/ para 4,<br>6-11 |
| Limitations | 1<br>9 | Discuss limitations of the study, taking into account sources of potential bias or imprecision.<br>Discuss both direction and magnitude of any potential bias | Page 16, lines 402-<br>413                                                                  | Conclusions/para 13          |

|                          |        |                                                                                                                                                                            |                                             |                           |
|--------------------------|--------|----------------------------------------------------------------------------------------------------------------------------------------------------------------------------|---------------------------------------------|---------------------------|
| Interpretation           | 2<br>0 | Give a cautious overall interpretation of results considering objectives, limitations, multiplicity of analyses, results from similar studies, and other relevant evidence | Page 14-16, lines 338-342, 361-368, 394-400 | Conclusion/ para 6, 8, 12 |
| Generalisability         | 2<br>1 | Discuss the generalisability (external validity) of the study results                                                                                                      | Page 17, lines 415-425                      | Conclusion/ Para 14       |
| <b>Other information</b> |        |                                                                                                                                                                            |                                             |                           |
| Funding                  | 2<br>2 | Give the source of funding and the role of the funders for the present study and, if applicable, <del>for the original study on which the present article is based</del>   | N/A, no funding                             |                           |

\*Give information separately for cases and controls in case-control studies and, if applicable, for exposed and unexposed groups in cohort and cross-sectional studies.

**Note:** An Explanation and Elaboration article discusses each checklist item and gives methodological background and published examples of transparent reporting. The STROBE checklist is best used in conjunction with this article (freely available on the Web sites of PLoS Medicine at <http://www.plosmedicine.org/>, Annals of Internal Medicine at <http://www.annals.org/>, and Epidemiology at <http://www.epidem.com/>). Information on the STROBE Initiative is available at [www.strobe-statement.org](http://www.strobe-statement.org).

Article information: <http://dx.doi.org/10.21037/atm-20-3651>

\*As the checklist was provided upon initial submission, the page number/line number reported may be changed due to copyediting and may not be referable in the published version. In this case, the section/paragraph may be used as an alternative reference.
